# Supplementary material
Source: PubMed Central journal article supplement (PMC7363147)
Supplement: supp_RA119.012121_157442_2_supp_539706_qb4zsd.pdf [file supp_RA119.012121_157442_2_supp_539706_qb4zsd.pdf]

## Supporting Information

### **The polycomb group protein PCGF6 mediates germline gene silencing by recruiting histone-modifying proteins to target gene promoters**

Mengjie Liu<sup>1</sup>, Yaru Zhu<sup>1</sup>, Fei Xing<sup>2</sup>, Shuang Liu<sup>1</sup>, Yin Xia<sup>3</sup>, Qing Jiang<sup>4</sup>, Jinzhong Qin<sup>1\*</sup>

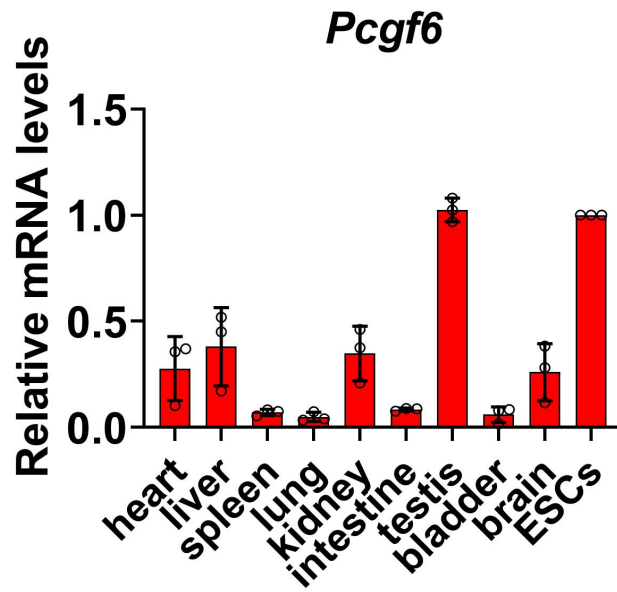

**Figure S1. Transcriptional levels of *Pcgf6* in various tissues of wild-type mice.** *Actin* was used as a control for normalization. The *Pcgf6* mRNA levels of wild-type ESCs were considered as 1. Data are from 3 biological replicates each with 3 technical replicates. Error bars are SD.

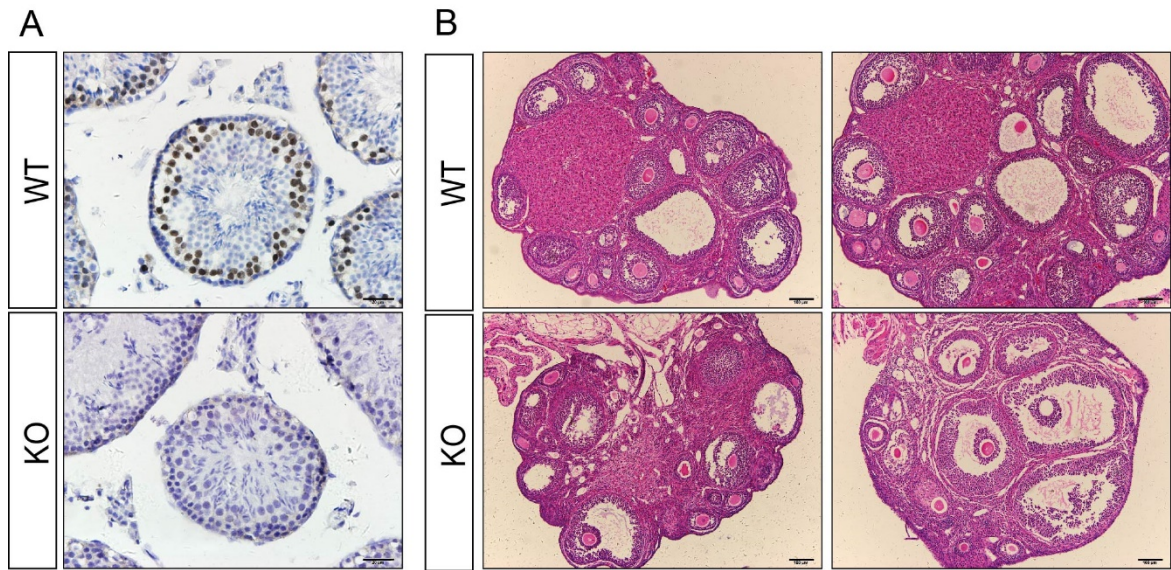

**Figure S2. Staining of tissue sections.** A. Immunohistochemistry staining of representative sections of the testes with the anti-Pcgf6 antibody. Scale bars represent 20  $\mu\text{m}$ . B. HE-staining of representative sections of the ovaries of the WT and *Pcgf6*<sup>-/-</sup> mice. Scale bars represent 100  $\mu\text{m}$ .

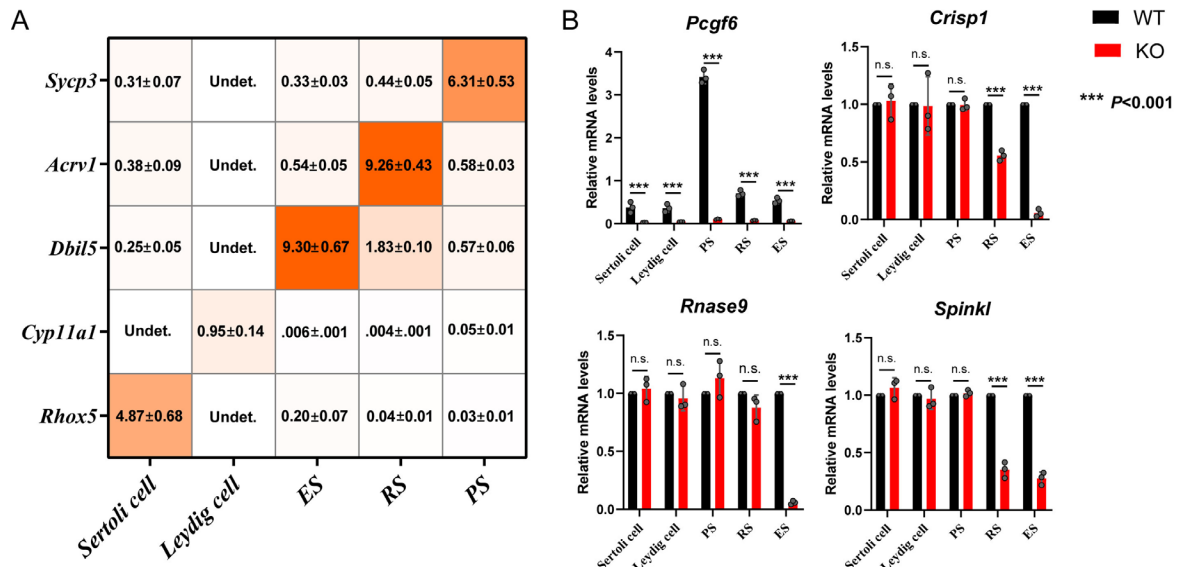

**Figure S3. Transcriptional levels of *Pcgf6* targeted genes in various testicular cell types.**

A. Expression levels of markers genes in purified cell populations. Values represent qRT-PCR analyses of RNA from purified mouse testicular cell populations with Sertoli, Leydig, and germ cell-specific markers, normalized to *Rps2* RNA. The values shown are representative of means  $\pm$  SD of six individuals, relative to those for total testes RNA. Primer sequences are available in Supplementary Table S1. PS, pachytene spermatocyte; RS, round spermatid; ES, elongating spermatid; Undet., undetected. B. The relative mRNA levels of indicated genes in purified testicular cell populations of wildtype and *Pcgf6*<sup>-/-</sup> mice. Error bars indicate  $\pm$  SD of 3 independent biological samples. n.s. means non-significant (two-tailed Student's t-test).

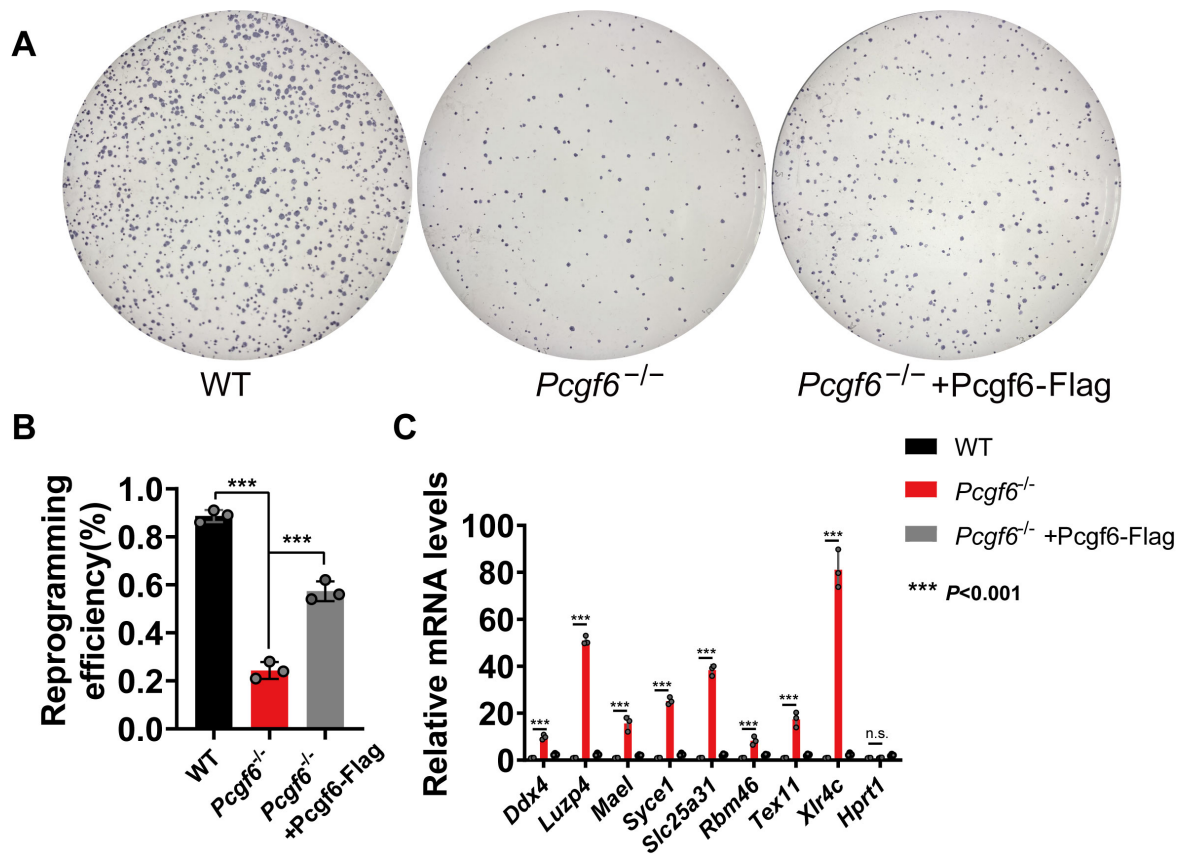

**Figure S4. Deficiency of *Pcgf6* decreases iPS colony numbers.** A. Effects of *Pcgf6* knockout on somatic cell reprogramming. iPS cell colonies were visualized in 60 mm dishes by AP staining at day 21. B. Quantification (average and SD) of iPS cell colonies from three independent experiments at day 21. C. Relative expression of the indicated germline-related genes in MEFs of the indicated genotypes determined by qRT-PCR. *Actin* was used as a control for normalization. Error bars indicate  $\pm$ SD of 3 independent experiments.

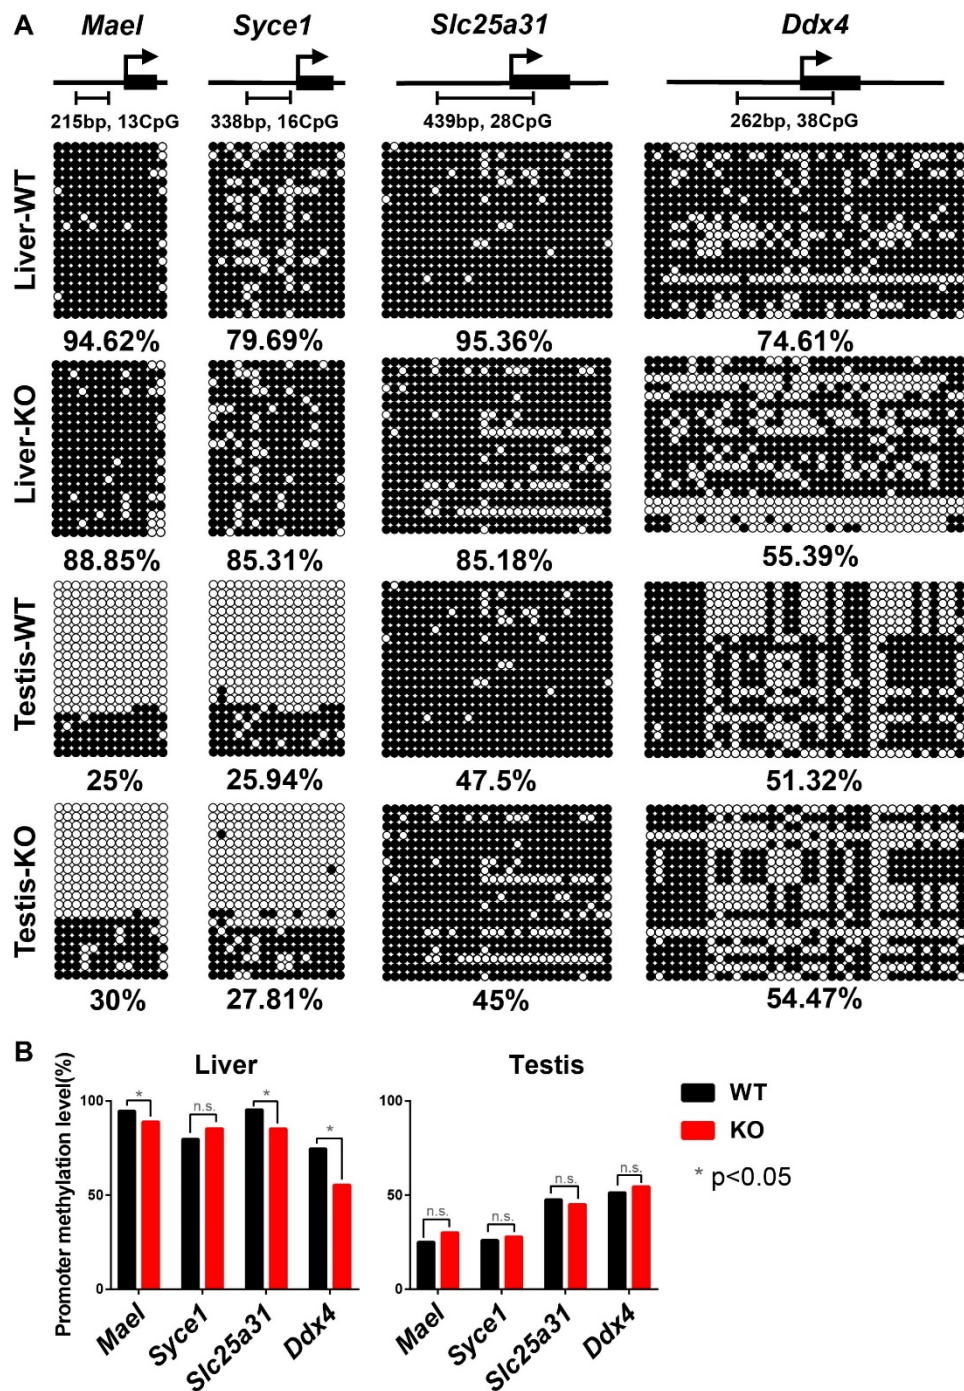

**Figure S5. DNA methylation levels of the germline genes are modestly decreased in the liver after *Pcgf6* depletion.**

A. Methylation status of CGI promoters of four up-regulated germline genes in the liver of *Pcgf6*<sup>-/-</sup> mice. Testis was used as a control. Cartoons demonstrate locations of CGIs relative to TSSs (arrows). CpG nucleotides are shown by black (methylated) or white (unmethylated) circles. Methylation extent is given as a percentage of methylated CpG. B. Bar graph ( $\chi^2$  test) of the CpG methylation levels.

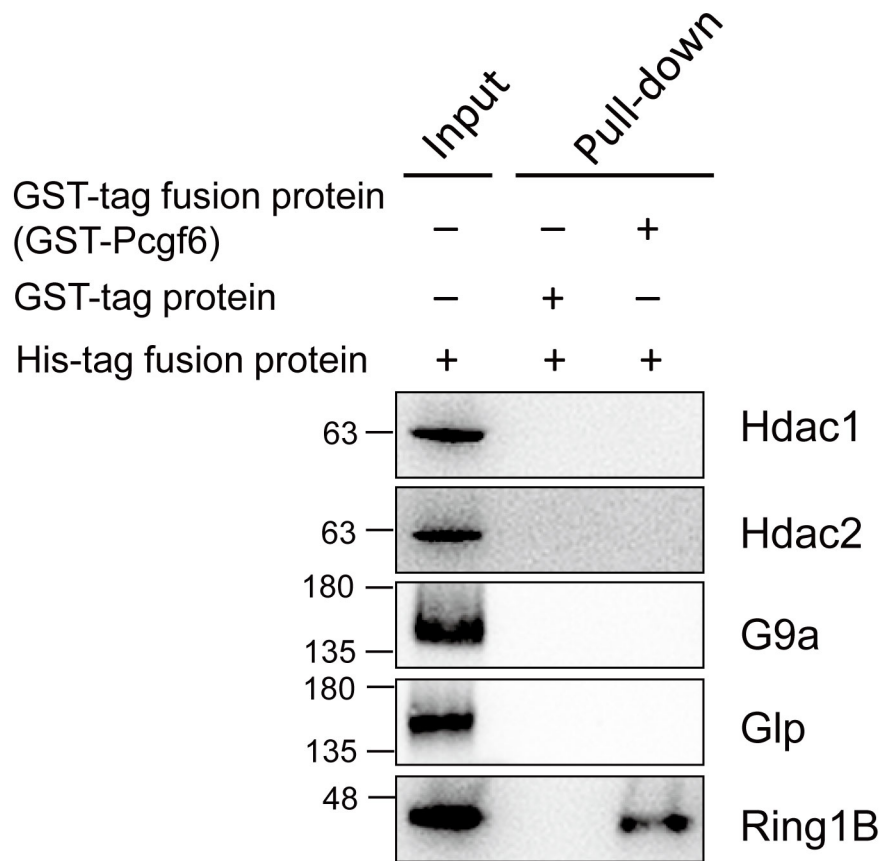

**Figure S6. Pcgf6 does not directly interact with Hdac1/2 and G9a/Glp.** His-tag fusion proteins were probed for interaction with GST-Pcgf6 in pull-down assays. GST tag alone is used as a negative control. The specific interaction of those proteins with GST-Pcgf6 was detected by Western blot with specific antibodies for Hdac1, Hdac2, G9a, Glp or Ring1B respectively. 10% of the fusion protein used in each assay was loaded as input. Assays were done independently for each protein. The results are representative of two independent experiments.

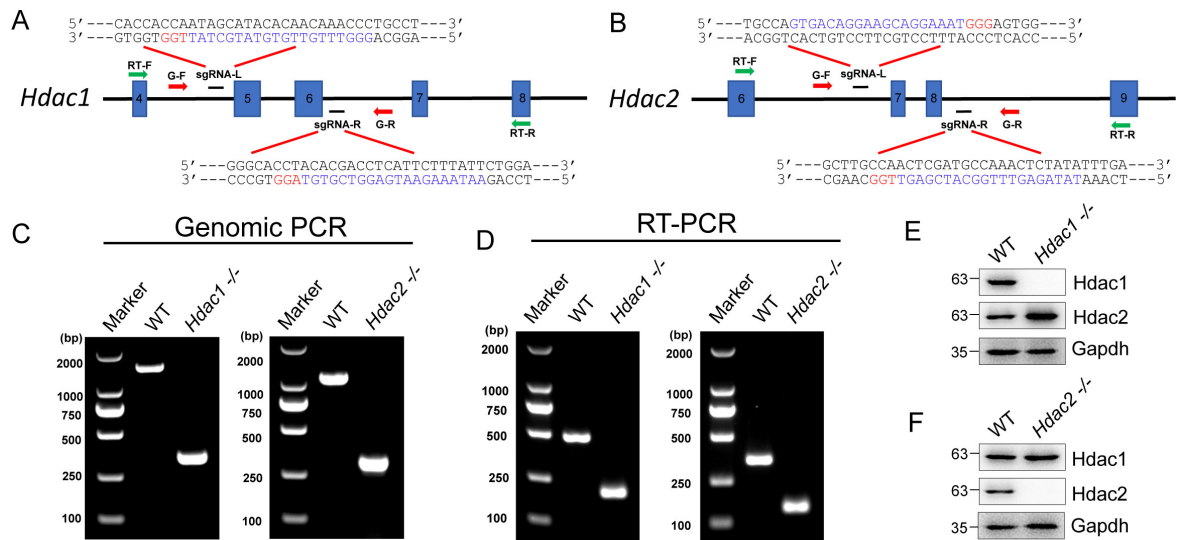

**Figure S7. Generation of *Hdac1* or *Hdac2* knockout ESCs.** A, B. The schematic of *Hdac1* and *Hdac2* gene targeting strategies. The exons 5-6 of *Hdac1* or the exons 7-8 of *Hdac2* were deleted by a pair of sgRNAs, respectively. The location of genomic PCR primers was shown by red arrows, and RT-PCR primers were represented by green arrows. C. Genomic PCR for analysis of *Hdac1/2* gene status. D. RT-PCR analysis for residual *Hdac1/2* mRNA. E, F. The absence of the proteins Hdac1 or Hdac2 in knockout ESCs analyzed by Western blot. Gapdh served as a loading control.



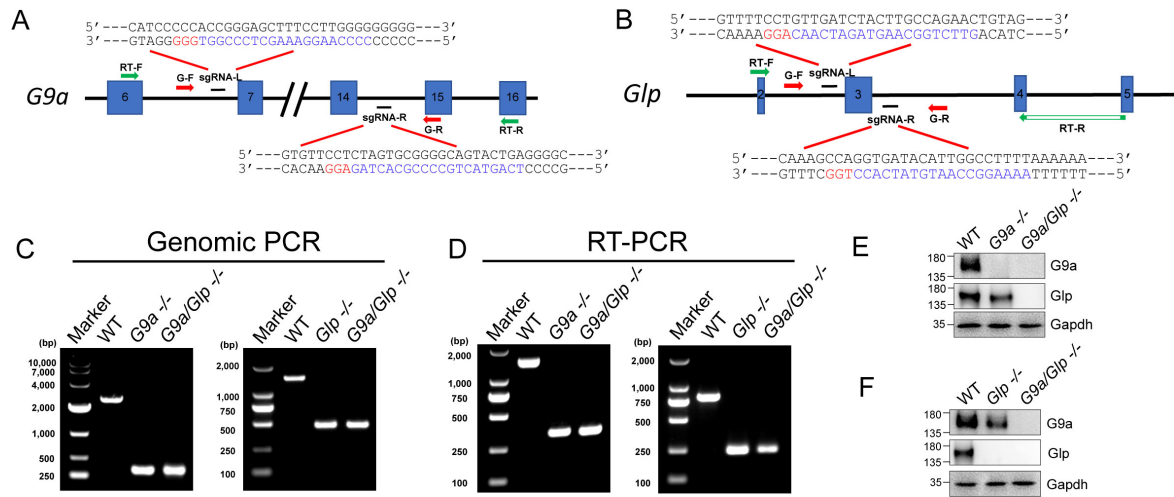

**Figure S8. Generation of *G9a* and *Glp* knockout ESCs.** A, B. The schematic of *G9a* and *Glp* gene targeting strategies. The exons 7-14 of *G9a* or the exons 3 of *Glp* were deleted by a pair of sgRNAs, respectively. The locations of genomic PCR primers were showed by red arrows, and RT-PCR primers were represented by green arrows. C. Genomic PCR for analysis of *G9a* and *Glp* gene status. D. RT-PCR analysis for residual *G9a* and *Glp* mRNA. E, F. The absence of the proteins G9a or Glp in knock-out ESCs analyzed by Western blot. Gapdh was used as a loading control.

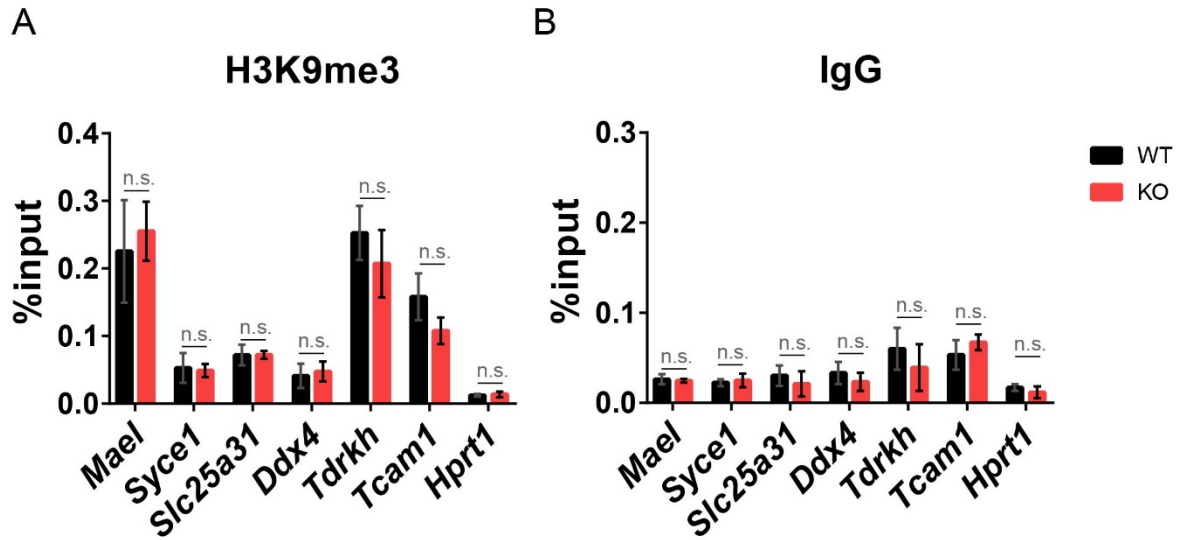

**Figure S9. ChIP of H3K9me3 followed by qPCR analysis in ESCs of indicated genotypes.** Purified rabbit IgG was used as a negative control. Error bars indicate  $\pm$  SD of 3 biological repeats. n.s. means non-significant (two-tailed Student's t-test).

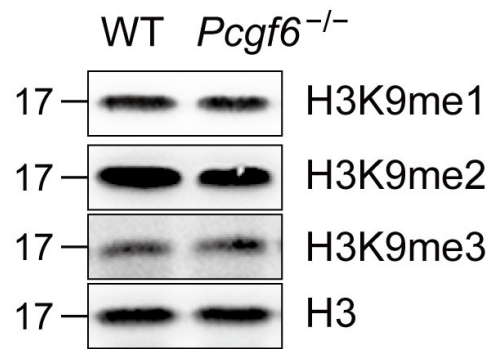

**Figure S10. Western blot showing the methylation levels of H3K9 in WT and *Pcgf6*<sup>-/-</sup> ESCs.**

**Table S1. List of Primers Used in this Study.**

| Using          | Target                          | Forward               | Reverse                                             |
|----------------|---------------------------------|-----------------------|-----------------------------------------------------|
| Genomic<br>PCR | <i>Pcgf6</i>                    | TGGGGAGGGAAGTTAAGAGG  | R1: TGAGCCCAAGAGTGTGGTA<br>R2: CTTGAACTCACGGCAATCCT |
|                | <i>Hdac1</i>                    | CTTATGGTGCACATGCAGACG | GATCAGGAGGCCGTGACAAT                                |
|                | <i>Hdac2</i>                    | AGCAGAAGAAGGCCTAGTCG  | TCAGACAACAAGGTACAGGTC                               |
|                | <i>G9a</i>                      | GCTTTTCGTGGAGTGTGGTT  | AGTTGGGGTCCAGGTTGTC                                 |
|                | <i>Glp</i>                      | ATGCCAGAAGAAAGCATTGG  | ACTTCACTCAATGCCAGGA                                 |
| RT-PCR         | <i>Hdac1</i>                    | TGAGGACTGTCCGGTGTTTG  | CACTGCACTAGGCTGGAACA                                |
|                | <i>Hdac2</i>                    | CAACAGATCGCGTGATGACC  | CGGATTGTGTAGCCTCCTCC                                |
|                | <i>G9a</i>                      | GAACTCTGGTAGCCTGTCCG  | GTTACCACGGCCTCCATTA                                 |
|                | <i>Glp</i>                      | AGTTCTGGCCAAGCAAGAGA  | ACAAAAGGCAAGCAAGCTGT                                |
| qRT-PCR        | <i>Pcgf6</i>                    | GCCAGTCCCTTCAAGCAAAG  | GCCCGATAGTTGCTTCTCCT                                |
|                | <i>Ddx4</i>                     | TGTCAGACGCTCAACAGGAT  | ACTGGATTGGGAGCTTGTGA                                |
|                | <i>Luzp4</i>                    | CAGACGTGACAGTAGGGGAA  | GGCCATGAGATCTGCCAATG                                |
|                | <i>mael</i>                     | TCTAAGACCTGGGTGCGAAG  | ACTGTTGCTGGCCTCATAGT                                |
|                | <i>Rbm46</i>                    | ATTGCAAATGGATCCAGAG   | TCCCAGAAGAGAGGGTAGCA                                |
|                | <i>Syce1</i>                    | CTGAGGTTGGATTTTGAAGA  | TCCTTGCTGCTGTCCAAAAC                                |
|                | <i>Sle25a31</i>                 | CGATCCGGTGTCTTTCTCGA  | ACATTTGCCAAATTGCCACG                                |
|                | <i>Tex11</i>                    | CCTGAGGCTGACTTGACCAT  | GGGGAGCCTCATCAACATATC                               |
|                | <i>Hprt1</i>                    | TCAGTCAACGGGGACATAAA  | GGGGCTGTACTGCTTAACCAG                               |
|                | <i>Xlr4c</i>                    | CCACTTCTTGAAAGTCCAGCA | TCAGAGAGTTTTCCAGCCTGT                               |
|                | <i>Xlr4b</i>                    | GAAACAATCTGGCCCTTGAA  | CTTCGCTCATGCTGGACTTT                                |
|                | <i><math>\beta</math>-actin</i> | AGCCATGTACGTAGCCATCC  | CTCTCAGCTGTGGTGGTGAA                                |
|                | <i>Mageb4</i>                   | TACTGCTGGCTTCCCTCAA   | TCTCCCTTAGATGCTGGCTG                                |
|                | <i>Zscan4c</i>                  | ACTCAGGAGCTGCAAAGTCT  | ACCATGACAGGAGGCTTCAA                                |
|                | <i>Tdrkh</i>                    | AATCATAGGGAGAGGCGGTG  | ACTGATTGGCTGCTTTCGTG                                |
| <i>Taf7l</i>   | GCATGGCATTACTCCACCAC            | GGCATGGACCCTTGACTTTC  |                                                     |
| <i>Hprt1</i>   | TCAGTCAACGGGGACATAAA            | GGGGCTGTACTGCTTAACCAG |                                                     |

|                         |                 |                          |                                    |
|-------------------------|-----------------|--------------------------|------------------------------------|
|                         | <i>Acrv1</i>    | TCAGCAACTTTCAAGCGAGTAT   | CTCCTGAAGAGTGCTCACCTG              |
|                         | <i>Cyp11a1</i>  | CCAGTGTCCCCATGCTCAAC     | TGCATGGTCCTTCCAGGTCT               |
|                         | <i>Dbil5</i>    | CCCAGGGCGACTGTAACATC     | GCAATGTAGATCCTCATGGCAT             |
|                         | <i>Rhox5</i>    | CACCAGGACCAAAGTGGCC      | GGTATGGAAGCTGAGGGTT                |
|                         | <i>Rps2</i>     | CTGACTCCCGACCTCTGGAAA    | GAGCCTGGGTCTCTGAACA                |
|                         | <i>Sycp3</i>    | AGCCAGTAACCAGAAAATTGAGC  | CCACTGCTGCAACACATTTCATA            |
|                         | <i>Rnase9</i>   | CCGAAGCTTCAGGGGAACTA     | ACAGCGCCCCTTATAGTGAA               |
|                         | <i>Crisp1</i>   | GCTGTTCTTCTTGGCTGCTG     | CTGCCAGATGGAGAAACCAT               |
|                         | <i>Spink1</i>   | TCTGACTTTGGTGCTTCTTCC    | CTATCATCTGCACAAACTGGGT             |
| Bisulfite<br>sequencing | <i>Ddx4</i>     | GGTTATGGAGTTAAGAGGTTT    | ACCAAAACCAAACCTAAAA                |
|                         | <i>Mael</i>     | GGAATGTGAAATATTTAGGAA    | TATAAAAATAAAAACAACCTAA<br>AACTAAAT |
|                         | <i>Syce1</i>    | TTGGTAATTGGGAATTGGG      | AACTTCCAAACTATTAACA<br>CACCTA      |
|                         | <i>Sle25a31</i> | AGGAGTTAATAAGTTTAGGGTGAT | AACACCTACAAACCACACCAAC             |
| CHIP-qPCR               | <i>Ddx4</i>     | CCTTGGAGAGAGAAACGGGA     | GCGGGGACAACAAATAGCAT               |
|                         | <i>Mael</i>     | ATCACAGTGCTCTCCCCAC      | CGCCCTTAGTAACCGAGCT                |
|                         | <i>Syce1</i>    | GCAGTGTCTAACAGCCTGGA     | CCCTTCAGCCACTACCTCTG               |
|                         | <i>Sle25a31</i> | ACACGTGTTATGGTCACATGC    | GCCTTCTTTGAAGACTGCTTCT             |
|                         | <i>Tdrkh</i>    | GTGAGCGTTGATTGGTGAGG     | TTCTCCCACACCCCAAACCTT              |
|                         | <i>Tcam1</i>    | TGTTACGCTTCTCCTCTCA      | GAGTCAAAGCGGTCGTCTTG               |
|                         | <i>Hprt1</i>    | GAATCCTCTGGGAGACGACA     | CGGAAAGCAGTGAGGTAAGC               |

**Table S2. List of antibodies used in this study.**

| Description       | Supplier                 | Product ID#  | Applications |
|-------------------|--------------------------|--------------|--------------|
| Anti-Pcgf6        | Abcam                    | ab200038     | WB, IP, CHIP |
| Anti-Ring1B       | Proteintech              | 16031-1-AP   | WB, CHIP     |
| Anti-Rybp         | Santa Cruz Biotechnology | sc-374235    | WB           |
| Anti-L3mbtl2      | Santa Cruz Biotechnology | sc-365134    | WB           |
| Anti-Max          | Santa Cruz Biotechnology | sc-197       | WB           |
| Anti-Hdac1        | CST                      | 5356         | WB,CHIP      |
| Anti-Hdac2        | CST                      | 5113         | WB,CHIP      |
| Anti-Hp1 $\gamma$ | CST                      | 2619         | WB           |
| Anti-E2f6         | Santa Cruz Biotechnology | sc-390022    | WB           |
| Anti-G9a          | RnD Systems              | PP-A8620A-00 | WB,CHIP      |
| Anti-Glp          | RnD Systems              | PP-B0422-00  | WB, CHIP     |
| Anti-Cbx8         | CST                      | 14696        | WB           |
| Anti-Ezh2         | CST                      | 5246         | WB           |
| Anti-H3k9me1      | Millipore                | 17-680       | WB,CHIP      |
| Anti-H3k9me2      | Millipore                | 17-648       | WB,CHIP      |
| Anti-H3k9me3      | Millipore                | 17-625       | WB,CHIP      |
| Anti-H3k27ac      | Abcam                    | Ab4729       | WB           |
| Anti-H2AK119ub1   | CST                      | 8240         | ChIP         |
| Anti-H3ac         | Millipore                | 06-599       | WB,CHIP      |
| Anti-H4ac         | Millipore                | 06-866       | CHIP         |
| Anti-H3           | Millipore                | 07-690       | WB           |
| Anti-Gapdh        | Santa Cruz Biotechnology | sc-47724     | WB           |

|                          |                          |         |    |
|--------------------------|--------------------------|---------|----|
| goat anti-mouse IgG-HRP  | Santa Cruz Biotechnology | sc-2005 | WB |
| goat anti-rabbit IgG-HRP | Santa Cruz Biotechnology | sc-2004 | WB |

**Table S3. The misregulated genes in the testis of *Pcgf6*<sup>-/-</sup> mice. Separate file (.xlsx)**

**Table S4. The misregulated genes in the liver of *Pcgf6*<sup>-/-</sup> mice. Separate file (.xlsx)**

**Table S5. The misregulated genes in the brain of *Pcgf6*<sup>-/-</sup> mice. Separate file (.xlsx)**
